# Supplementary material
Source: PubMed Central journal article supplement (PMC3158225)
Supplement: 1100572108_pnas.201100572SI.pdf [file 1100572108_pnas.201100572SI.pdf]

# Supporting Information

Harnik 10.1073/pnas.1100572108

## SI Text

**Summary of Literature Sources Used in This Study.** The datasets analyzed in this study were assembled through field work by the author, use of existing collections at the Academy of Natural Sciences, Florida Museum of Natural History, National Museum of Natural History, and Paleontological Research Institution, and literature compilation. These sources are the literature sources used for these analyses. Further reading is coded as follows: [A] denotes references that provided abundance data, [B] denotes references that provided body size data and/or plates from which measurements were made, and [O] denotes references that provided occurrence data.

1. Allen, J. E. (1970) New species of Eocene Mollusca from the Gulf Coast. *Tulane Studies in Geology and Paleontology* **8**, 69–78. [B, O]
2. Barry, J. O. & Le Blanc, R. J. (1942) Lower Eocene faunal units of Louisiana. *Louisiana Geological Survey, Geological Bulletin* **23**. [B, O]
3. Clark, W. B. & Martin, G. C. (1901) The Eocene deposits of Maryland. *Maryland Geological Survey*. [B, O]
4. CoBabe, E. A. & Allmon, W. D. (1994) Effects of sampling on paleoecological and taphonomic analyses in high-diversity fossil accumulations: An example from the Eocene Gosport Sand, Alabama. *Lethaia* **27**, 167–178. [A, O]
5. Cooke, C. W. & MacNeil, F. S. (1952) Tertiary stratigraphy of South Carolina. *USGS Professional Paper 243-B*. [O]
6. Dockery, D. T., III (1977) Mollusca of the Moodys Branch Formation, Mississippi. *Mississippi Geological Survey, Bulletin* **120**, 1–212. [O]
7. Dockery, D. T., III (1980) The invertebrate macropaleontology of the Clarke County, Mississippi area. *Mississippi Geological Survey Bulletin* **122**, 1–387. [B, O]
8. Dockery, D. T., III (1982) Lower Oligocene Bivalvia of the Vicksburg Group in Mississippi. *Mississippi Bureau of Geology, Bulletin* **123**, 1–261. [A, B, O]
9. Dockery, D. T., III (1997) *Carditamera williamsi*, a new species from the late Eocene of Mississippi. *Mississippi Geology* **18**, 57–60. [B, O]
10. Elder, S. R. (1981) in *Geology* (University of Texas at Austin, Austin), pp 140. [A, O]
11. Emerson, J. H. & Emerson, B. (2001) *Middle Eocene Claiborne Group invertebrate fossils from Stone City Bluff, Burleson County, Texas* (John H. Emerson, publisher, Houston). [O]
12. Gardner, J. (1926) Mollusca of the Tertiary formations of northeastern Mexico. *Geological Society of America Memoir* **11**, 1–332. [O]
13. Gardner, J. A. (1933) The Midway Group of Texas. *University of Texas Bulletin* **3301**, 1–403. [B, O]
14. Gardner, J. A. & Bowles, E. (1937) The *Venericardia planicosta* group in the Gulf Province. *USGS Professional Paper 189-F*. [B, O]
15. Garvie, C. L. (1996) The molluscan macrofauna of the Reklaw Formation, Marquez Member (Eocene: Lower Claibornian), in Texas. *Bulletins of American Paleontology* **111**, 1–177. [A, B, O]
16. Glawe, L. N. (1969) *Pecten perplanus* stock (Oligocene) of the southeastern United States. *Geological Survey of Alabama Bulletin* **91**, 1–179. [B, O]
17. Glawe, L. N. (1974) Upper Eocene and Oligocene Pectinidae of Georgia and their stratigraphic significance. *State of Georgia Information Circular* **46**. [O]
18. Hansen, T. A. (1978) in *Geology* (Yale University, New Haven), pp. 310. [A, O]
19. Hansen, T. A., Farrell, B. R. & Upshaw, B. (1993) The first 2 million years after the Cretaceous-Tertiary boundary in east Texas: Rate and paleoecology of the molluscan recovery. *Paleobiology* **19**, 251–265. [A, O]
20. Hansen, T. A., Upshaw, B., III, Kauffman, E. G. & Gose, W. (1993) Patterns of molluscan extinction and recovery across the Cretaceous-Tertiary boundary in east Texas: Report on new outcrops. *Cretaceous Research* **14**, 685–706. [A, O]
21. Hansen, T. A., Kelley, P. H. & Haasl, D. M. (2004) Paleoecological patterns in molluscan extinctions and recoveries: Comparison of the Cretaceous-Paleogene and Eocene-Oligocene extinctions in North America. *Palaeogeography, Palaeoclimatology, Palaeoecology* **214**, 233–242. [A, O]
22. Harris, G. D. (1894) The Tertiary geology of southern Arkansas. *Annual Report of the Geological Survey of Arkansas for 1892* **2**, 1–207. [O]
23. Harris, G. D. (1896) The Midway Stage. *Bulletins of American Paleontology* **1**, 1–164. [B, O]
24. Harris, G. D. (1897) The Lignitic Stage. Part I. Stratigraphy and Pelecypoda. *Bulletins of American Paleontology* **2**, 1–103. [B, O]
25. Harris, G. D. (1919) Pelecypoda of the St. Maurice and Claiborne Stages. *Bulletins of American Paleontology* **6**, 1–268. [B, O]
26. Harris, G. D. (1951) Preliminary notes on Ocala bivalves. *Bulletins of American Paleontology* **33**, 1–54. [B, O]
27. Harris, G. D. & Palmer, K. V. W. (1946) The Mollusca of the Jackson Eocene of the Mississippi Embayment (Sabine River to the Alabama River). *Bulletins of American Paleontology* **30**, 1–206. [B, O]
28. Harrison, H. C. (1994) in *Geology* (University of South Florida, Tampa), pp 93. [A, O]
29. Heaslip, W. G. (1968) Cenozoic evolution of the alticostate venericards in Gulf and East Coastal North America. *Palaeontographica Americana* **6**, 51–135. [B, O]
30. Ivany, L. C. (1997) in *Geology* (Harvard University, Cambridge), pp. 221. [A, O]
31. Kellum, L. B. (1926) Paleontology and stratigraphy of the Castle Hayne and Trent Marls in North Carolina. *USGS Professional Paper 143*. [O]
32. Manker, J. P. & Carter, B. D. (1987) Paleoecology and paleogeography of an extensive rhodolith facies from the Lower Oligocene of South Georgia and north Florida. *Palaos* **2**, 181–188. [O]
33. Mansfield, W. C. (1940) Mollusks of the Chickasawhay Marl. *Journal of Paleontology* **14**, 171–227. [O]
34. Nelson, P. C. (1975) in *Geology* (Texas A&M, College Station), pp. 168. [A, O]
35. Palmer, K. V. W. (1927/1929) The Veneridae of Eastern America, Cenozoic and Recent. *Palaeontographica Americana* **1**, 209–522. [B, O]
36. Palmer, K. V. W. & Brann, D. C. (1965) Catalogue of the Paleocene and Eocene Mollusca of the southern and eastern United States: Part I. Pelecypoda, Amphineura, Pteropoda, Scaphopoda, and Cephalopoda. *Bulletins of American Paleontology* **48**, 1–466. [B, O]
37. Price, W. A. & Palmer, K. V. W. (1928) A new fauna from the Cook Mountain Eocene near Smithville, Bastrop County, Texas. *Journal of Paleontology* **2**, 20–31. [B, O]

38. Richards, H. G. (1947) Invertebrate fossils from deep wells along the Atlantic Coastal Plain. *Journal of Paleontology* **21**, 23–37. [B, O]

39. Richards, H. G. (1948) Tertiary invertebrate fossils from newly discovered localities in North and South Carolina Part I. *Academy of Natural Sciences of Philadelphia Notulae Naturae* **207**. [O]

40. Richards, H. G. & Palmer, K. V. W. (1953) Eocene mollusks from Citrus and Levy counties, Florida. *Florida Geological Survey Bulletin* **35**, 1–95. [B, O]

41. Sessa, J. A., Patzkowsky, M. E. & Bralower, T. J. (2009) The impact of lithification on the diversity, size distribution, and recovery dynamics of marine invertebrate assemblages. *Geology* **37**, 115–118. [A, O]

42. Stenzel, H. B., Krause, E. K. & Twining, J. T. (1957) Pelecypoda from the type locality of the Stone City Beds (Middle Eocene) of Texas. *University of Texas Publication No. 5704*, 1–237. [B, O]

43. Swindel, D. B. (1986) in *Geology* (University of Alabama, Tuscaloosa), pp 376. [A, O]

44. Toulmin, L. D. (1977) Stratigraphic distribution of Paleocene and Eocene fossils in the eastern Gulf coast region. *Geological Survey of Alabama Monograph 13* **1**, 1–602. [A, B, O]

45. Tucker, H. I. (1934) Some Atlantic Coast Tertiary Pectinidae. *American Midland Naturalist* **15**, 612–621. [B, O]

46. Tucker, H. I. (1936) The Atlantic and Gulf Coast Tertiary Pectinidae of the United States. *American Midland Naturalist* **17**, 471–490. [B, O]

47. Tucker-Rowland, H. I. (1936) The Atlantic and Gulf Coast Tertiary Pectinidae of the United States. *American Midland Naturalist* **17**, 985–1107. [B, O]

48. Tucker-Rowland, H. I. (1938) The Atlantic and Gulf Coast Tertiary Pectinidae of the United States. *Memoires du Musee Royal d'Histoire Naturelle de Belgique* **2d ser., fasc. 13**. [B, O]

49. Veatch, O. & Stephenson, L. W. (1911) Preliminary report on the geology of the Coastal Plain of Georgia. *Geological Survey of Georgia Bulletin* **26**. [O]

50. Visaggi, C. C. (2004) in *Geology* (Syracuse University, Syracuse), pp 106. [A, O]

51. Ward, L. W. (1985) Stratigraphy and characteristic mollusks of the Pamunkey Group (Lower Tertiary) and the Old Church Formation of the Chesapeake Group - Virginia Coastal Plain. *USGS Professional Paper* 1346. [B, O]

52. Whitfield, R. P. (1885) Brachiopoda and Lamellibranchiata of the Raritan clays and green-sand marls of New Jersey. *USGS Monograph* **9**. [B, O]

53. Zumwalt, G., Pratt, J. & Moncrief, J. (1995) Marine macroinvertebrate paleoenvironmental interpretation of the Harvey Site (Cook Mountain, Eocene) in north-central Louisiana. *Mississippi Geology* **16**, 12–21. [A, O]

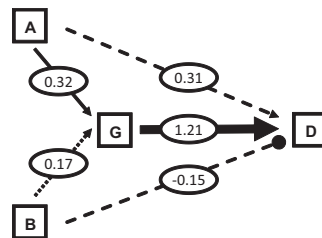

**Fig. S1.** A clade-independent structural equation model of direct and indirect effects fit to the pooled data for all bivalve species. Variables are abundance (A), body size (B), geographic range size (G), and species duration (D). Values presented are model coefficients. Line thickness indicates effect size, and line type denotes statistical significance; solid lines are significant at  $\alpha = 0.05$ , and dashed lines are hypothesized effects that are nonsignificant at  $\alpha = 0.05$ . Arrows indicate positive effects, and the filled circle indicates negative effects.

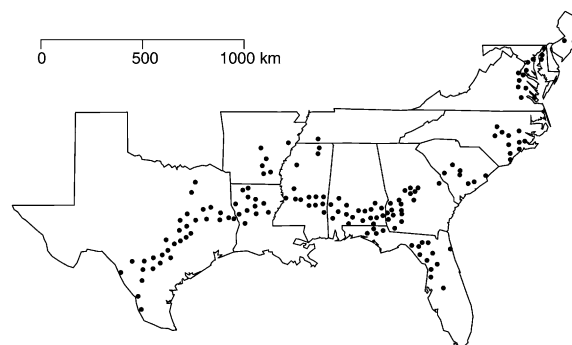

**Fig. S2.** Map illustrating the distribution of fossil occurrences over the Paleogene of the Gulf and Atlantic Coastal Plains of the eastern United States. Points are the centroids of each county containing one or more fossil occurrences in the database.

**Table S1. Nonparametric Spearman rank order correlation tests of the associations between biological factors and species duration**

|                               | Spearman $\rho$ |
|-------------------------------|-----------------|
| Abundance vs. duration        | <b>0.27</b>     |
| Body size vs. duration        | 0.09            |
| Geographic range vs. duration | <b>0.39</b>     |

Significance at  $\alpha < 0.05$  is indicated by bold type. When examined separately, both abundance and geographic range size are significantly correlated with duration.

**Table S2. Multigroup structural equation models that differ in the extent to which coefficients vary among bivalve superfamilies (denoted with an X) or are assumed to be equal**

| Model rank | Paths vary among clades |   |   |          |   | Model selection |              |       | Goodness of fit |    |       |
|------------|-------------------------|---|---|----------|---|-----------------|--------------|-------|-----------------|----|-------|
|            | Direct                  |   |   | Indirect |   | AIC             | $\Delta$ AIC | AW    | $\chi^2$        | df | P     |
|            | A                       | B | G | A        | B |                 |              |       |                 |    |       |
| 1          |                         | X |   |          | X | 53.073          | 0            | 0.377 | 11.073          | 9  | 0.271 |
| 2          |                         | X |   |          |   | 53.192          | 0.119        | 0.355 | 15.192          | 11 | 0.174 |
| 3          | X                       | X |   |          | X | 55.629          | 2.556        | 0.105 | 9.629           | 7  | 0.211 |
| 4          |                         | X |   | X        | X | 56.404          | 3.331        | 0.071 | 10.404          | 7  | 0.167 |
| 5          |                         |   |   |          |   | 57.356          | 4.283        | 0.044 | 23.356          | 13 | 0.038 |
| 6          | X                       | X |   | X        | X | 58.959          | 5.886        | 0.020 | 8.959           | 5  | 0.111 |
| 7          | X                       | X | X |          |   | 59.575          | 6.502        | 0.015 | 13.575          | 7  | 0.059 |
| 8          |                         |   |   | X        | X | 60.568          | 7.495        | 0.009 | 18.568          | 9  | 0.029 |
| 9          | X                       | X | X | X        | X | 62.787          | 9.714        | 0.003 | 8.787           | 3  | 0.032 |
| 10         | X                       |   |   | X        |   | 63.640          | 10.567       | 0.002 | 21.640          | 9  | 0.010 |

Paths linked directly to duration are direct effects. Paths linked to duration by geographic range are indirect effects. A, abundance; B, body size; G, geographic range size; D, duration. Models were ranked using Akaike's information criterion (AIC), with the relative support for each model summarized by the Akaike weights (AW);  $\Delta$ AIC is the AIC difference between each model and the best model. The model  $\chi^2$  provides a measure of goodness of fit. Multigroup models in which the direct effects of body size vary among superfamilies have the greatest support.

**Table S3. Direct effects of geographic range on duration when geographic extent is measured relative to the maximum distance between fossiliferous localities over the Paleogene (Paleogene) or over the individual durations of species (Duration)**

|                    | Coefficient | P      |
|--------------------|-------------|--------|
| Extent (Paleogene) | 2.16        | <0.001 |
| Extent (Duration)  | 1.28        | <0.001 |

Both measures of geographic extent have a significant effect on species duration, but uncorrected measures (Paleogene) show a stronger association because of the pooling of species from intervals characterized by differing degrees of sampling.

**Table S4. Direct effects of geographic range on duration when either extent or occupancy is used to estimate species geographic range size**

|           | Coefficient    | AIC    | AW     |
|-----------|----------------|--------|--------|
| Extent    | <b>1.28</b>    | 565.33 | 0.82   |
| A + B + E | <b>E, 1.21</b> | 568.34 | 0.18   |
| Occupancy | 0.57*          | 578.00 | <<0.01 |
| A + B + O | O, 0.33        | 579.74 | <<0.01 |

A, abundance; B, body size; E, geographic extent; O, occupancy. Significance at  $\alpha < 0.05$  is indicated by bold type. Model selection was assessed using Akaike's information criterion (AIC). The relative support for each model is summarized using the Akaike weights (AW).

\*P values between 0.05 and 0.1.
